# Supplementary material for: St. John’s Wort (Hypericum perforatum) Products – How Variable Is the Primary Material?
Source: Front Plant Sci. 2019 Jan 24;9:1973. doi: 10.3389/fpls.2018.01973 (PMC6357942; doi:10.3389/fpls.2018.01973)
Supplement: Supplementary file 4 [file Table_2.XLSX]

## Sheet: Foglio1
Species name	Subspecies	Taxonomically acceptable names	Source
H. acmosepalum N. Robson			Flora of China, 2018
H. ascyron	subsp. ascyron Linnaeus	Ascyron sibiricum Lamarck ex Poiret; H. ascyron var. giraldii R. Keller ; H. ascyron var. hupehense Pampanini; H. ascyron var. longistylum Maximowicz; H. ascyron var. micropetalum R. Keller; H. ascyron var. umbellatum R. Keller; H. biondii R. Keller p.p.; H. hemsleyanum H. Levéillé & Vaniot; H. longifolium H. Levéillé; H. scallanii R. Keller; Roscyna gmelinii Spach; Roscyna japonica Blume	Flora of China, 2018
H. ascyron	subsp. gebleri (Ledebour)	H. gebleri Ledebour; H. ascyron var. brevistylum Maximowicz; H. ascyron var. macrosepalum Ledebour; Roscyna gebleri (Ledebour) Spach	Flora of China, 2018
H. beanii N. Robson			Flora of China, 2018
H. densiflorum Pursch.		H. glomeratum Small; H. interior Small; H. nothum Rehder; H. prolificum Linnaeus var. densiflorum (Pursh) A. Gray	Flora of North America, 2018
H. elodeoides Choisy		H. napaulense Choisy	Flora of China, 2018
H. japonicum		Brathys japonica (Thunberg) Wight; B. laxa Blume; H. cavaleriei H. Levéillé; H. chinense Osbeck (1757), nom. utique rej., not Linnaeus (1759), nor Retzius (1788); H. japonicum var. canyculatum (H. Levéillé) Koidzumi; H. japonicum var. maximowiczii R. Keller; H. laxum (Blume) Koidzumi; H. nervatum Hance; H. thunbergii Franchet & Savatier; Sarothra japonica (Thunberg) Y. Kimura; S. laxa (Blume) Y. …	Flora of China, 2018
H. patulum		H. argyi H. Levéillé & Vaniot; Komana patula (Thunberg) Y. Kimura ex Honda ; Norysca patula (Thunberg) J. Voigt	Flora of China, 2018
H. perforatum	subsp. perforatum Stjep.-Vesel.	H. perforatum var [β] sensu Choisy; H. perforatum var. vulgare Schimp. & Spenn.; H. marylandicum Biroli ex Colla; H. perforatum var. [γ] latifolium sensu W. Koch; H. assurgens Peterm.; H. perforatum var. petiolatum Peterm.; H. lineolatum Jord.; H. perforatum var. alpinum Parl.; H. perforatum var. anomalum Frid.; H. perforatum var. [α] typicum Beck; H. perforatum var. vulgare subvar. lineolatum (j…	Robson, 2002
H. perforatum	subsp. songaricum (Ledeb. Ex Rchb.) N. Robson	H. perforatum var. [β] latiglandulosum Choisy; H. songaricum Ledeb. ex Rchb.; H. perforatum var. songaricum (Ledeb. Ex Rchb.) K. Koch; H. perforatum var. gracile Gruner; H. komarovii Gorschk.	Robson, 2002
H. perforatum	subsp. veronense (Schrank) H. Lindb.	H. veronense Schrank; H. perforatum var. [δ] angustifolium DC; H. perforatum var. [ε] microphyllum DC; H. perforatum var. [γ] sensu Choisy; H. perforatum var. [γ] elatum Choisy; H. stenophyllum Opiz; H. perforatum var. nanum Gaudin; H. perforatum var. veronense (Schrank) Ces.; H. perforatum var. stenophyllum (Opiz) Wimm. & Grab.; H. schlosseri Heuff.; H. microphyllum Jord.; H. chrysosticum Webb; …
H. perforatum	subsp. chinense N. Robson	H. perforatum var. microphyllum H. Levéillé; H. foliosissimum Koidz.; H. perforatum var. angustifolium sensu Ohwi.	Robson, 2002
H. uralum		H. patulum Thunberg var. attenuatum Choisy; H. patulum var. uralum (Buchanan-Hamilton ex D. Don) Koehne; Norysca urala (Buchanan-Hamilton ex D. Don)K. Koch	Flora of China, 2018
Flora of China n. d., vol. 13, accessed May 2018. http://www.efloras.org/florataxon.aspx?flora_id=2&taxon_id=10203
Flora of North America n. d., vol. 6, accessed May 2018. http://www.efloras.org/florataxon.aspx?flora_id=1&taxon_id=250100845
Robson, NKB. Studies in the genus Hypericum L. (Guttiferae). 4(2). Section 9. Hypericum sensu lato (part 2): subsection 1. Hypericum series 1. Hypericum. Bulletin of the British Museum of Natural History (Botany) (2002);32(2):61–123
Table 2 List of taxonomically valid names
